# Supplementary material for: Development and internal validation of multivariable prediction models for biochemical failure after MRI-guided focal salvage high-dose-rate brachytherapy for radiorecurrent prostate cancer
Source: PubMed Central journal article supplement (PMC8261471; doi:10.1016/j.ctro.2021.06.005), 2021-06-29
Supplement: mmc1.pdf [file mmc1.pdf]

SUPPLEMENTARY FILE A

| <i>Study/treatment group</i> | <i>N</i> | <i>Years of inclusion</i> | <i>Study specific inclusion criteria</i>                                                                                                                                                                                                                                                                                                                                                                                                                                                                                                                                                                                                                                                                                                                                                                      |
|------------------------------|----------|---------------------------|---------------------------------------------------------------------------------------------------------------------------------------------------------------------------------------------------------------------------------------------------------------------------------------------------------------------------------------------------------------------------------------------------------------------------------------------------------------------------------------------------------------------------------------------------------------------------------------------------------------------------------------------------------------------------------------------------------------------------------------------------------------------------------------------------------------|
| Feasibility study            | 30       | 2013-2017                 | <p><i>Patient characteristics</i></p> <p>Age <math>\geq</math> 18 years;<br/>           Karnofsky Performance Status <math>\geq</math> 70;<br/>           Fit for spinal anaesthesia;<br/>           International Prostate Symptom Score <math>&lt;</math> 15.</p> <p><i>Tumour characteristics</i></p> <p>Tumour location technically feasible for brachytherapy;<br/>           Tumour visible MRI and PSMA/choline-PET/CT;<br/>           Biopsy proven local recurrence;<br/>           PSA level <math>\leq</math> 10 ng/mL;<br/>           PSA doubling time (PSADT) <math>\geq</math> 12 months;<br/>           Tumour stage (MRI) <math>\leq</math> T2c;<br/>           Recurrence <math>\geq</math> 2 years after primary radiotherapy;<br/>           No lymph node and/or distant metastases.</p> |
| PRECISE study                | 42       | 2018-2019                 | <p><i>Patient characteristics</i></p> <p>See 'Feasibility study'.</p> <p><i>Tumour characteristics</i></p> <p>Tumour location technically feasible for brachytherapy;<br/>           Concordance between PSMA-PET/CT and mp-MRI;<br/>           PSA level <math>\leq</math> 20 ng/mL;<br/>           PSA doubling time (PSADT) <math>\geq</math> 9 months;<br/>           Tumour stage (MRI) <math>\leq</math> T3b;<br/>           Recurrence <math>\geq</math> 2 years after primary radiotherapy;<br/>           No lymph node and/or distant metastases.</p>                                                                                                                                                                                                                                               |
| Non-study                    | 78       | 2015-2020                 | <p><i>Patient characteristics</i></p> <p>See 'Feasibility study'.</p> <p><i>Tumour characteristics</i></p> <p>No specific criteria (i.e., those not eligible for treatment within either the feasibility of the PRECISE study, for example due to higher pre-salvage PSA and/or shorter PSA doubling time).</p>                                                                                                                                                                                                                                                                                                                                                                                                                                                                                               |
