# Supplementary material for: Development and internal validation of multivariable prediction models for biochemical failure after MRI-guided focal salvage high-dose-rate brachytherapy for radiorecurrent prostate cancer
Source: PubMed Central journal article supplement (PMC8261471; doi:10.1016/j.ctro.2021.06.005), 2021-06-29
Supplement: mmc2.pdf [file mmc2.pdf]

## SUPPLEMENTARY FILE B

Additional variables used for multiple imputation via chained equations:

- Primary treatment
  - *EBRT, LDR brachytherapy, or HDR brachytherapy*
- Pelvic lymph node dissection at primary treatment (yes/no)
- Initial NCCN risk group
  - *Low risk (T1-T2a AND Gleason  $\leq 6$  AND PSA  $< 10$  ng/mL), Intermediate risk (T2b-T2c OR Gleason 7 OR PSA 10-20 ng/mL), or High risk ( $\geq$  T3a OR Gleason  $\geq 8$  OR PSA  $> 20$  ng/mL)*
- ADT use
  - *No,  $\leq 36$  months, or  $> 36$  months*
- PSA nadir post-primary treatment (ng/mL)
- Prostate size on pre-salvage MRI (cm<sup>3</sup>)
- Maximum tumour diameter on pre-salvage MRI (mm)
- V200% CTV (%)
- PSA velocity (ng/mL/years)
- Interval between primary and salvage treatment (months)
- Previous salvage treatment (yes/no)
- Time to nadir post-primary treatment (months)
- Deceased (yes/no)
