# Supplementary material for: Development and internal validation of multivariable prediction models for biochemical failure after MRI-guided focal salvage high-dose-rate brachytherapy for radiorecurrent prostate cancer
Source: PubMed Central journal article supplement (PMC8261471; doi:10.1016/j.ctro.2021.06.005), 2021-06-29
Supplement: mmc3.pdf [file mmc3.pdf]

SUPPLEMENTARY FILE C

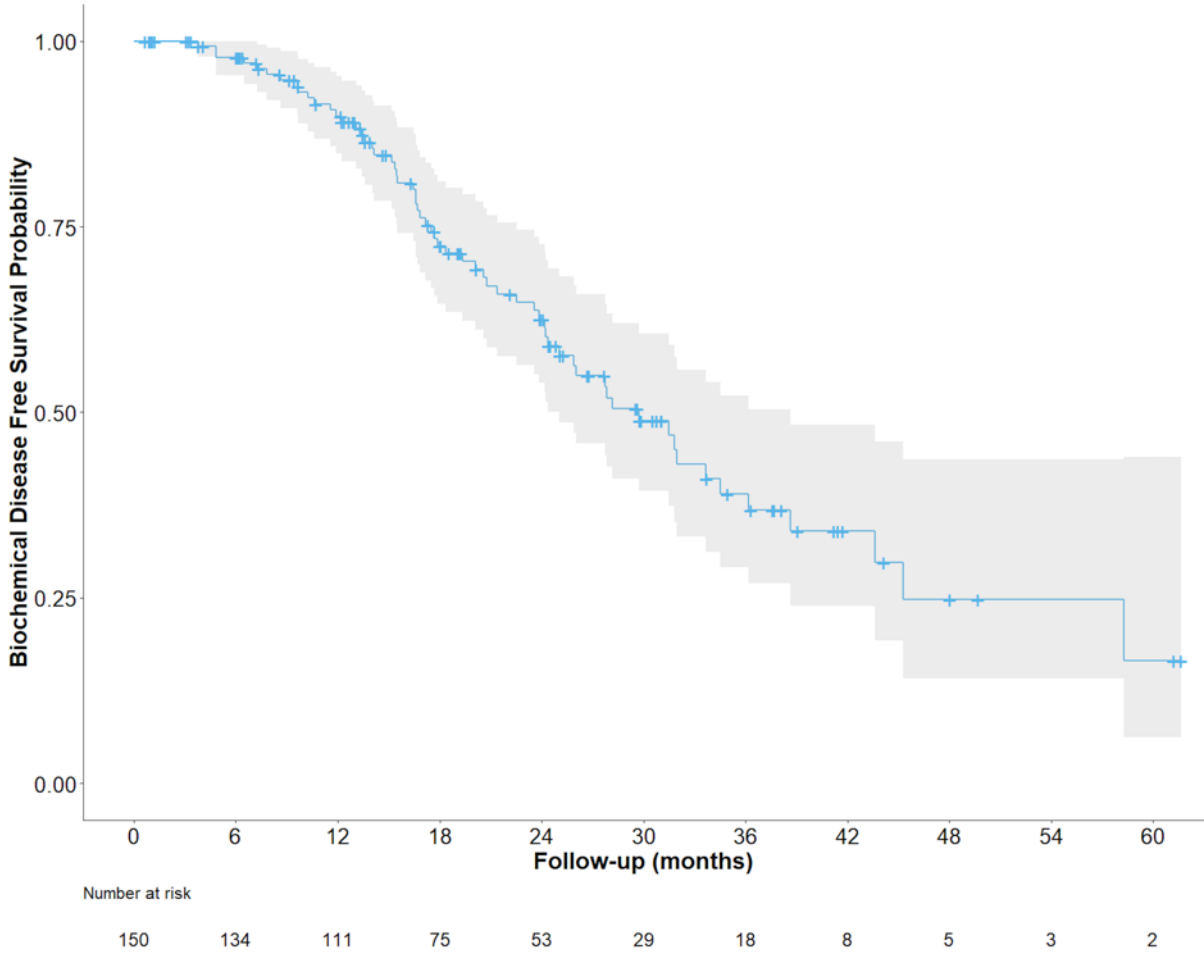

**Figure S1** Kaplan-Meier curve depicting biochemical disease-free survival for the entire FS-HDR-BT group.
