# Supplementary material for: Development and internal validation of multivariable prediction models for biochemical failure after MRI-guided focal salvage high-dose-rate brachytherapy for radiorecurrent prostate cancer
Source: PubMed Central journal article supplement (PMC8261471; doi:10.1016/j.ctro.2021.06.005), 2021-06-29
Supplement: mmc4.pdf [file mmc4.pdf]

SUPPLEMENTARY FILE D

| <i>Predictor</i>                        | <i>Range in dataset used for model building</i> |
|-----------------------------------------|-------------------------------------------------|
| Pre-salvage PSADT (months)              | 3 – 73 months                                   |
| Age at FS-HDR-BT (years)                | 59 – 85 years                                   |
| Pre-salvage PSA (ng/mL)                 | 0.4 – 39.0 ng/mL                                |
| GTV (cm <sup>3</sup> )                  | 0.5 – 22 cm <sup>3</sup>                        |
| Time to PSA nadir post-salvage (months) | 1 – 25 months                                   |
| PSA reduction post-salvage (%)          | 0 – 100 %                                       |

*Abbreviations: PSADT = prostate specific antigen doubling time. FS-HDR-BT = focal salvage high-dose-rate-brachytherapy. PSA = prostate specific antigen. GTV = gross tumour volume.*
