# Supplementary material for: Development and internal validation of multivariable prediction models for biochemical failure after MRI-guided focal salvage high-dose-rate brachytherapy for radiorecurrent prostate cancer
Source: PubMed Central journal article supplement (PMC8261471; doi:10.1016/j.ctro.2021.06.005), 2021-06-29
Supplement: mmc5.pdf [file mmc5.pdf]

## SUPPLEMENTARY FILE E

### Model 1

The full regression equation for model 1 is as follows:

$$h(t) = h_0(t) * \exp (-0.065 * Age + 0.78 * \ln (PSA) + 0.053 * GTV - 0.14 * PSADT + 0.16 * PSADT')$$

Or for calculating the predicted survival probability:

$$s(t) = s_0(t)^{\exp (-0.065 * Age + 0.78 * \ln (PSA) + 0.053 * GTV - 0.14 * PSADT + 0.16 * PSADT')}$$

Where:

$h(t)$  = the expected hazard at time  $t$

$h_0(t)$  = the baseline hazard at time  $t$

$s(t)$  = the expected survival probability at time  $t$

$s_0(t)$  = the baseline survival at time  $t$  (see Table 2 for baseline survival at 12, 24, and 36 months)

Age = age in years at time of FS-HDR-BT

ln = natural logarithm

PSA = pre-salvage PSA level in ng/mL

GTV = gross tumour volume in  $\text{cm}^3$

PSADT = PSA doubling time in months

PSADT' can be calculated as follows:

$$PSADT' = \frac{(PSADT - 7.98)_+^3 - 1.43(PSADT - 15.70)_+^3 + 0.44(PSADT - 33.63)_+^3}{657.9225}$$

**Model 2:**

$$h(t) = h_0(t) * \exp(-0.087 * Age + 1.50 * \ln(PSA) + 0.40 \\ * Seminal\ vesicle\ involment - 0.12 * PSADT + 0.15 * PSADT' - 0.20 \\ * Time\ to\ PSA\ nadir - 0.021 * \%PSA\ reduction)$$

Or for calculating the predicted survival probability:

$$s(t) \\ = s_0(t) \frac{\exp(-0.087 * Age + 1.50 * \ln(PSA) + 0.40 * Seminal\ vesicle\ involvement - 0.12 * PSADT + 0.15 * PSADT' - 0.20 * Time\ to\ PSA\ nadir - 0.021 * \%PSA\ reduction)}{1}$$

Where:

$h(t)$  = the expected hazard at time  $t$

$h_0(t)$  = the baseline hazard at time  $t$

$s(t)$  = the expected survival probability at time  $t$

$s_0(t)$  = the baseline survival at time  $t$  (see Table 2 for baseline survival at 12, 24, and 36 months)

Age = age in years at time of FS-HDR-BT

ln = natural logarithm

PSA = pre-salvage PSA level in ng/mL

Seminal vesicle involvement = 0 when not applicable, 1 when applicable

Time to PSA nadir = post-salvage time to nadir in months

%PSA reduction = PSA reduction (ratio between pre-salvage PSA and post-salvage PSA nadir) in %

PSADT = PSA doubling time in months

PSADT' can be calculated as follows:

$$PSADT' = \frac{(PSADT - 7.98)_+^3 - 1.43(PSADT - 15.70)_+^3 + 0.44(PSADT - 33.63)_+^3}{657.9225}$$
